# Supplementary material for: Near-infrared emission of dibenzoxanthenium and its application in the design of nitric oxide probes
Source: Royal Society of Chemistry journal article supplement (doi:10.1039/c5ob00042d), 2015-01-01
Supplement: c5ob00042d1.pdf [file c5ob00042d1.pdf]

## Near-infrared emission of dibenzoxanthonium and its application in the design of nitric oxide probes

Wu Liu,<sup>a</sup> Chen Fan,<sup>b</sup> Ru Sun,<sup>a,\*</sup> Yu-Jie Xu,<sup>b</sup> Jian-Feng Ge<sup>a,c,\*</sup>

<sup>a</sup> College of Chemistry, Chemical Engineering and Material Science, Collaborative Innovation Center of Suzhou Nano Science and Technology, Soochow University, Suzhou 215123, P. R. China. Email: sunru924@hotmail.com, ge\_jianfeng@hotmail.com.

<sup>b</sup> School of Radiation Medicine and Protection, Medicinal College, Soochow University, Suzhou 215123, P. R. China.

<sup>c</sup> Jiangsu Key Laboratory of Medical Optics, Suzhou Institute of Biomedical Engineering and Technology, Chinese Academy of Sciences, Suzhou 215163, P. R. China.

### Index

#### 1. Figures .....S3

**Fig. S1** Normalized excitation spectra (blue line) and normalized emission spectra (red line) of probes **1a–b** in the absence (dotted line) and presence (solid line) of 2.2 equiv. NO donor. (a) probe **1a**, left: Excitation spectra ( $\lambda_{em} = 681$  nm), right: Emission spectra ( $\lambda_{ex} = 600$  nm); (b) probe **1b**, left: Excitation spectra, ( $\lambda_{em} = 750$  nm), right: Emission spectra ( $\lambda_{ex} = 633$  nm).....S3

**Fig. S2** Emission spectra of probe **1b** ( $\lambda_{ex} = 663$  nm) towards different amount of NO donor (0–2.2 equiv.) in HEPES buffer (20 mM, pH = 7.4)–DMSO (1/1, v/v) solutions, inset is the linear response of fluorescence intensities ( $\lambda_{em} = 750$  nm) towards NO donor concentrations (0–1.8 equiv.).....S3

**Fig. S3** The frontier molecular orbitals (FMOs) involved in the vertical excitation and emission of probe **1a** and **1a** + NO. (a) probe **1a**, (b) probe **1a**+NO. CT, IC and PET stand for conformation transformation, internal conversion and photoinduced electron transfer respectively. Excitation and radiative processes are marked as solid lines and the non-radiative processes are marked by dotted lines. For details please refer to Tables S1 and S2.....S4

**Fig. S4** Fluorescent responses of probe **1a** (10  $\mu$ M) to different analytes; (a) emission spectra; (b) fluorescent intensities. NO donor (25  $\mu$ M); common cations:  $K^+$  (100 mM),  $Na^+$  (100 mM),  $Ca^{2+}$  (0.5 mM),  $Cd^{2+}$  (0.3 mM),  $Cu^{2+}$  (0.3 mM),  $Mg^{2+}$  (0.5 mM),  $Co^{2+}$  (0.3 mM),  $Hg^{2+}$  (0.3 mM),  $Mn^{2+}$  (0.3 mM),  $Fe^{2+}$  (0.3 mM); bioactive amino acids (0.1 mM): Cys, Phe, Gly, Glu, Arg, Lys, Pro, Try, His; reactive oxygen and nitrogen species (50  $\mu$ M):  $HO^\bullet$ ,  $H_2O_2$ ,  $ClO^-$ ,  $O_2^{\bullet-}$ , and  $ONOO^-$ ; oxidized forms of NO (50  $\mu$ M):  $NO_2^-$  and  $NO_3^-$ ; and ascorbic acid (AA, 50  $\mu$ M).....S4

#### 2. Tables .....S5

Table S1 Selected parameters for the vertical excitation (UV-vis absorptions) of probes **1a–1b** and **1a/b** + NO based on the optimized ground state geometries in water. ....S5

---

*Table S2 Selected parameters for emission related of probes 1a–1b and 1a/b + NO based on the optimized lowest singlet excited state geometries in water.*.....S5

**3. Appendix**.....S6

**Fig. S5** <sup>1</sup>H-NMR of probe **1a**. .....S6

**Fig. S6** <sup>13</sup>C-NMR of probe **1a**. .....S6

**Fig. S7** HRMS(ESI<sup>+</sup>) of probe **1a**. .....S7

**Fig. S8** <sup>1</sup>H-NMR of probe **1b**. .....S7

**Fig. S9** <sup>13</sup>C-NMR of probe **1b**. .....S8

**Fig. S10** HRMS(ESI<sup>+</sup>) of probe **1b**. .....S8

**Fig. S11** HRMS(ESI<sup>+</sup>) of probe **1a** + NO donor. ....S9

**Fig. S12** HRMS(ESI<sup>+</sup>) of probe **1b** + NO donor. ....S9

## 1. Figures

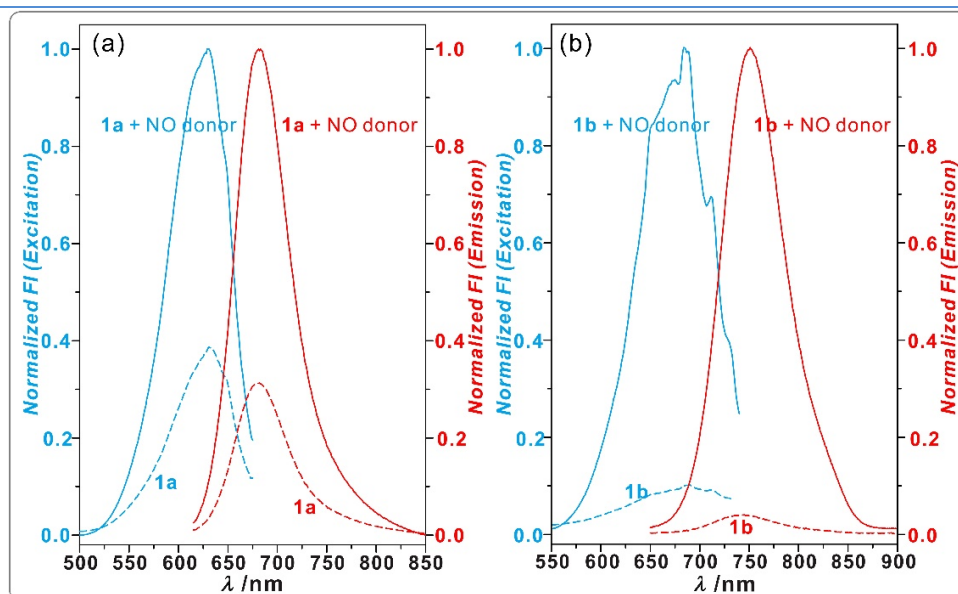

**Fig. S1** Normalized excitation spectra (blue line) and normalized emission spectra (red line) of probes **1a–b** in the absence (dotted line) and presence (solid line) of 2.2 equiv. NO donor. (a) probe **1a**, left: Excitation spectra ( $\lambda_{em} = 681$  nm), right: Emission spectra ( $\lambda_{ex} = 600$  nm); (b) probe **1b**, left: Excitation spectra, ( $\lambda_{em} = 750$  nm), right: Emission spectra ( $\lambda_{ex} = 633$  nm).

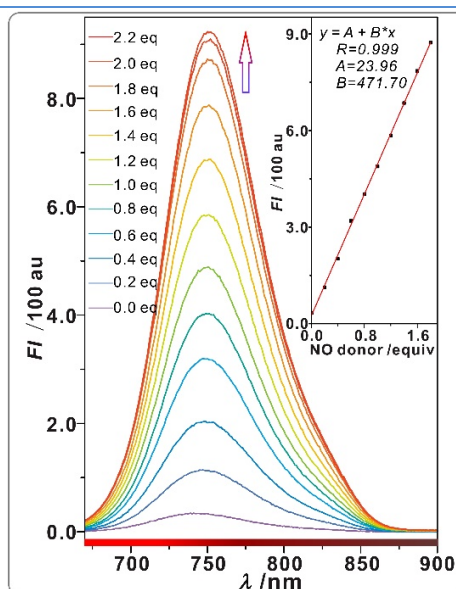

**Fig. S2** Emission spectra of probe **1b** ( $\lambda_{ex} = 663$  nm) towards different amount of NO donor (0–2.2 equiv.) in HEPES buffer (20 mM, pH = 7.4)–DMSO (1/1, v/v) solutions, inset is the linear response of fluorescence intensities ( $\lambda_{em} = 750$  nm) towards NO donor concentrations (0–1.8 equiv.).

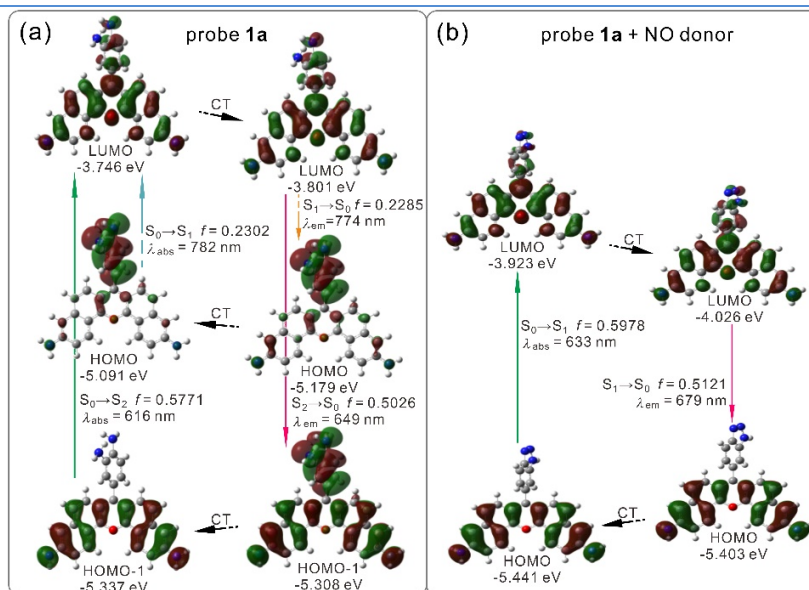

**Fig. S3** The frontier molecular orbitals (FMOs) involved in the vertical excitation and emission of probe **1a** and **1a** + NO. (a) probe **1a**, (b) probe **1a**+NO. CT, IC and PET stand for conformation transformation, internal conversion and photoinduced electron transfer respectively. Excitation and radiative processes are marked as solid lines and the non-radiative processes are marked by dotted lines. For details please refer to Tables S1 and S2.

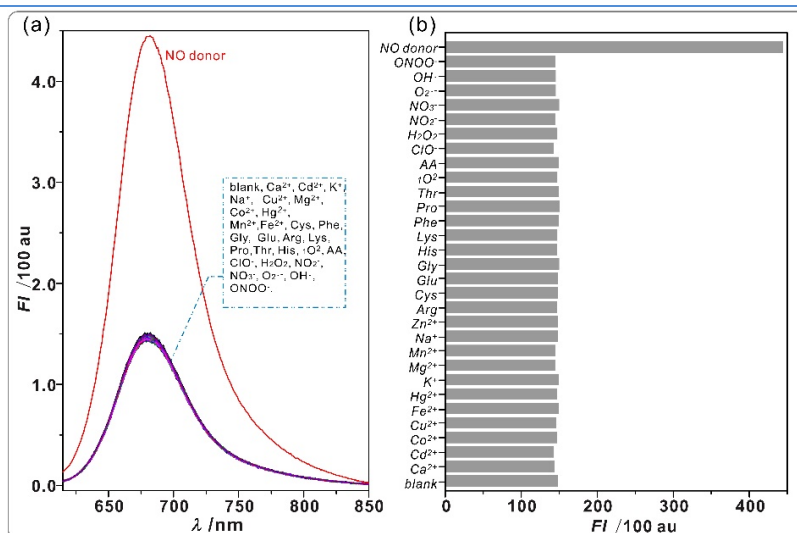

**Fig. S4** Fluorescent responses of probe **1a** (10  $\mu$ M) to different analytes; (a) emission spectra; (b) fluorescent intensities. NO donor (25  $\mu$ M); common cations:  $K^+$  (100 mM),  $Na^+$  (100 mM),  $Ca^{2+}$  (0.5 mM),  $Cd^{2+}$  (0.3 mM),  $Cu^{2+}$  (0.3 mM),  $Mg^{2+}$  (0.5 mM),  $Co^{2+}$  (0.3 mM),  $Hg^{2+}$  (0.3 mM),  $Mn^{2+}$  (0.3 mM),  $Fe^{2+}$  (0.3 mM); bioactive amino acids (0.1 mM): Cys, Phe, Gly, Glu, Arg, Lys, Pro, Try, His; reactive oxygen and nitrogen species (50  $\mu$ M):  $HO\cdot$ ,  $H_2O_2$ ,  $ClO^-$ ,  $O_2^{\cdot-}$ , and  $ONOO^-$ ; oxidized forms of NO (50  $\mu$ M):  $NO_2^-$  and  $NO_3^-$ ; and ascorbic acid (AA, 50  $\mu$ M).

## 2. Tables

**Table S1** Selected parameters for the vertical excitation (UV-vis absorptions) of probes **1a–1b** and **1a/b** + NO based on the optimized ground state geometries in water.

| probe          | Electronic transitions | Excitation energy |                     | $\lambda_{\text{exp.}}/\text{nm}$ | $f^a$  | Composition <sup>b</sup> | CI <sup>c</sup> |
|----------------|------------------------|-------------------|---------------------|-----------------------------------|--------|--------------------------|-----------------|
|                |                        | E/eV              | $\lambda/\text{nm}$ |                                   |        |                          |                 |
| <b>1a</b>      | $S_0 \rightarrow S_1$  | 1.58              | 782                 |                                   | 0.2302 | H→L                      | 0.70114         |
|                | $S_0 \rightarrow S_2$  | 2.01              | <u>616</u>          | 599                               | 0.5771 | H-1→L                    | 0.70137         |
| <b>1a</b> + NO | $S_0 \rightarrow S_1$  | 1.96              | <u>633</u>          | 608                               | 0.5978 | H→L                      | 0.70097         |
| <b>1b</b>      | $S_0 \rightarrow S_1$  | 1.59              | 780                 |                                   | 0.2451 | H-1→L                    | -0.23159        |
|                |                        |                   |                     |                                   |        | H→L                      | 0.66245         |
|                | $S_0 \rightarrow S_2$  | 1.80              | <u>687</u>          | 664                               | 0.7188 | H-1→L                    | 0.66350         |
| <b>1b</b> + NO |                        |                   |                     |                                   |        | H→L                      | 0.23216         |
|                | $S_0 \rightarrow S_1$  | 1.76              | <u>706</u>          | 679                               | 0.7462 | H→L                      | 0.70333         |

<sup>a</sup> Oscillator strength. <sup>b</sup> H stands for HOMO and L stands for LUMO. <sup>c</sup> Coefficient of the wavefunction for each excitations.

**Table S2** Selected parameters for emission related of probes **1a–1b** and **1a/b** + NO based on the optimized lowest singlet excited state geometries in water.

| probe         | Electronic transitions | Excitation energy |                     | $\lambda_{\text{exp.}}/\text{nm}$ | $f^a$  | Composition <sup>b</sup> | CI <sup>c</sup> |
|---------------|------------------------|-------------------|---------------------|-----------------------------------|--------|--------------------------|-----------------|
|               |                        | E/eV              | $\lambda/\text{nm}$ |                                   |        |                          |                 |
| <b>1a</b>     | $S_0 \rightarrow S_1$  | 1.67              | 744                 |                                   | 0.2885 | H-3→L                    | -0.10252        |
|               |                        |                   |                     |                                   |        | H→L                      | 0.69646         |
| <b>1a</b> +NO | $S_0 \rightarrow S_2$  | 1.91              | <u>649</u>          | 676                               | 0.5026 | H-1→L                    | 0.70280         |
|               | $S_0 \rightarrow S_1$  | 1.82              | <u>679</u>          | 678                               | 0.5121 | H→L                      | 0.70212         |
| <b>1b</b>     | $S_0 \rightarrow S_1$  | 0.60              | 2060                |                                   | 0.0001 | H→L                      | 0.70704         |
|               | $S_0 \rightarrow S_2$  | 1.75              | 709                 |                                   | 0.0160 | H→L+1                    | 0.70584         |
|               | $S_0 \rightarrow S_3$  | 1.76              | <u>703</u>          | 733                               | 0.7657 | H-1→L                    | 0.70246         |
| <b>1b</b> +NO | $S_0 \rightarrow S_1$  | 1.62              | <u>765</u>          | 745                               | 0.6446 | H→L                      | 0.70374         |

<sup>a</sup> Oscillator strength. <sup>b</sup> H stands for HOMO and L stands for LUMO. <sup>c</sup> Coefficient of the wavefunction for each excitations.

## 3. Appendix

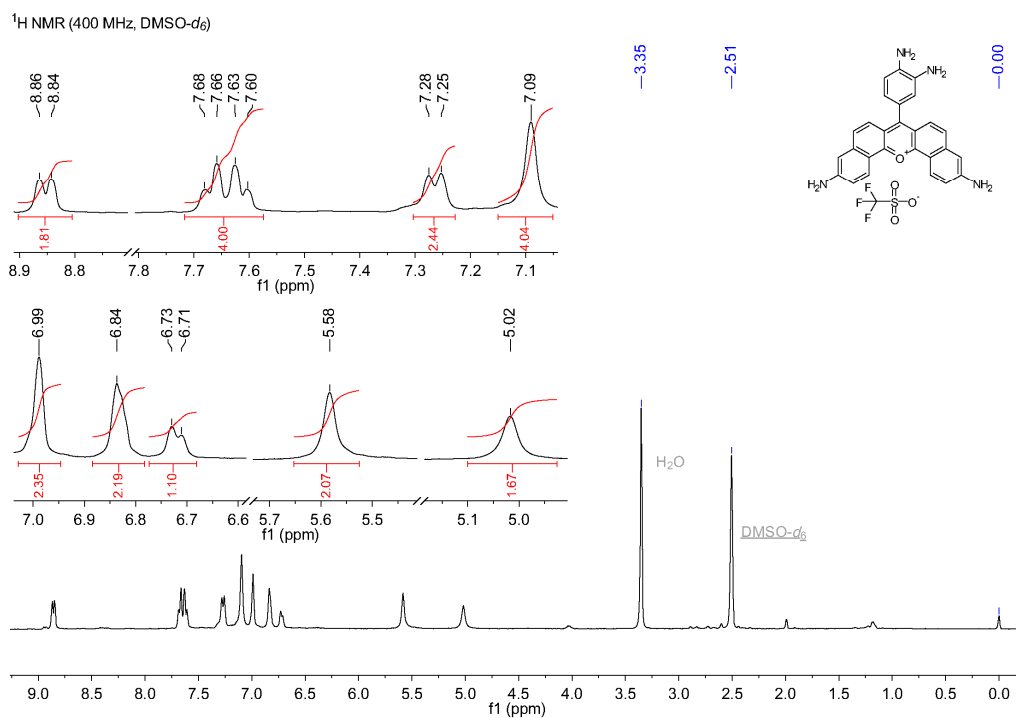Fig. S5 <sup>1</sup>H-NMR of probe 1a.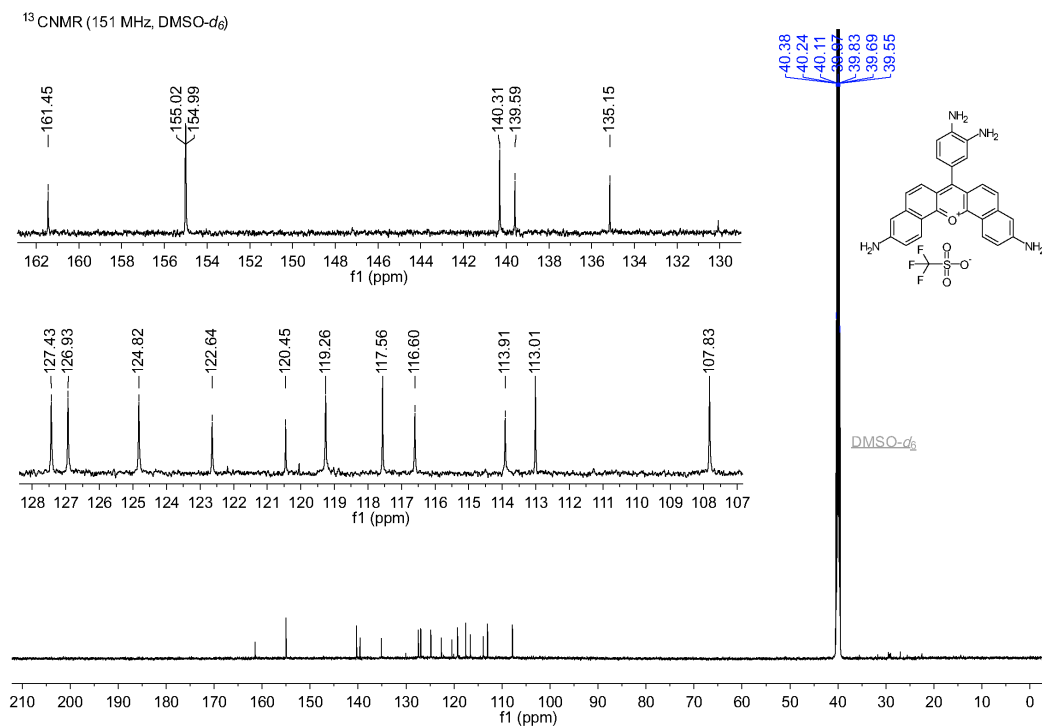Fig. S6 <sup>13</sup>C-NMR of probe 1a.

| Sample Name   | LW-67   | Position    | Vial 1 | Instrument Name | Instrument 1 | User Name              |                       |
|---------------|---------|-------------|--------|-----------------|--------------|------------------------|-----------------------|
| Inj Vol       | 0       | InjPosition |        | SampleType      | Sample       | IRM Calibration Status | Success               |
| Data Filename | LW-01.d | ACQ Method  |        | Comment         |              | Acquired Time          | 10/10/2014 2:38:04 PM |

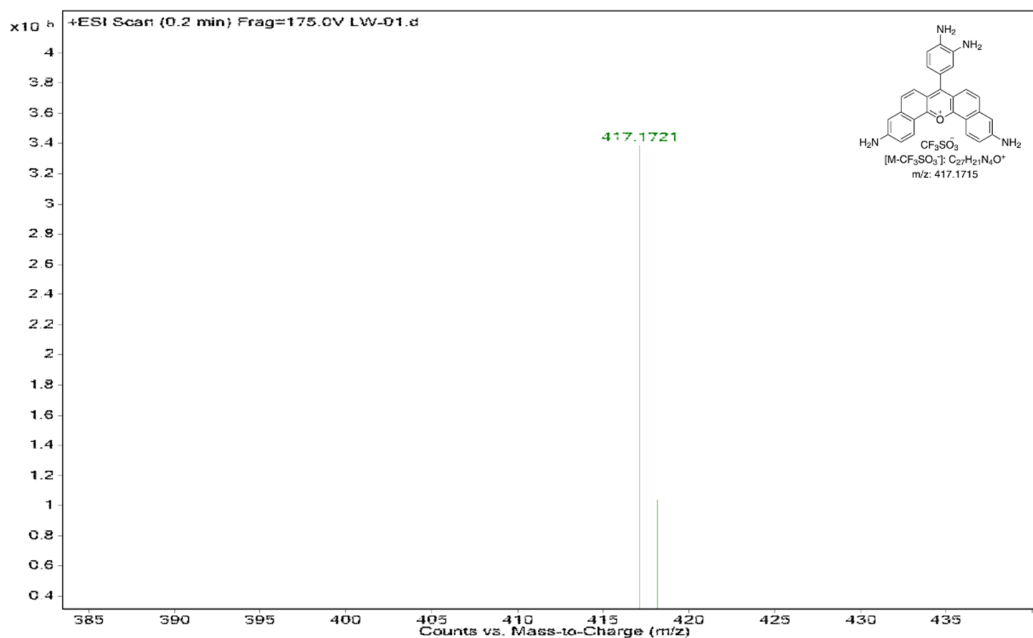Fig. S7 HRMS(ESI<sup>+</sup>) of probe 1a.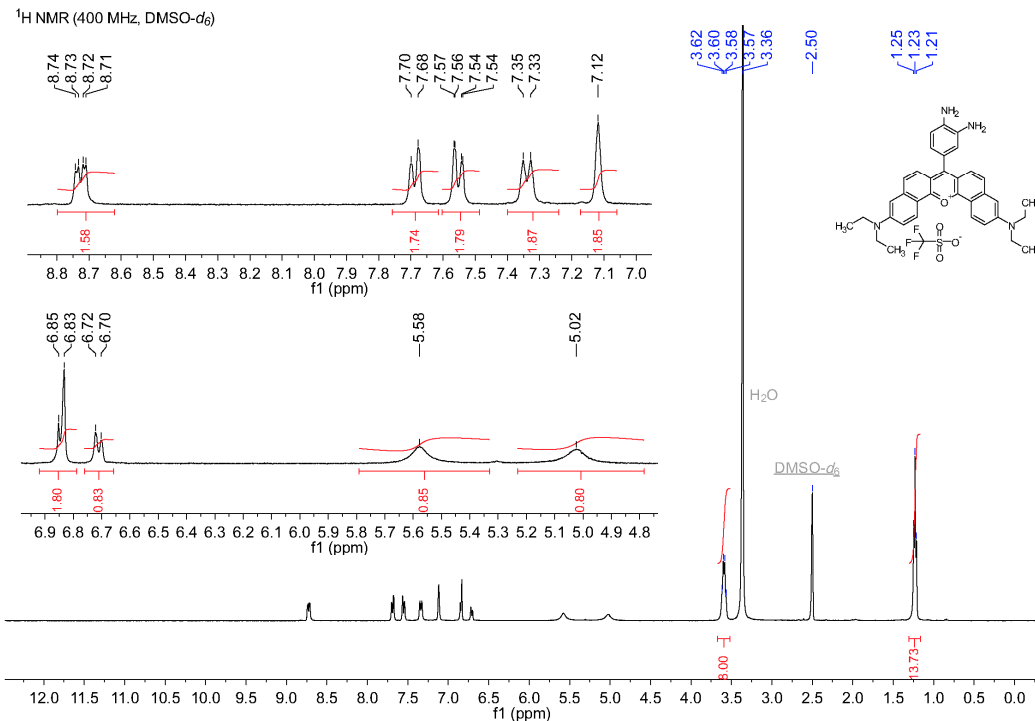Fig. S8 <sup>1</sup>H-NMR of probe 1b.

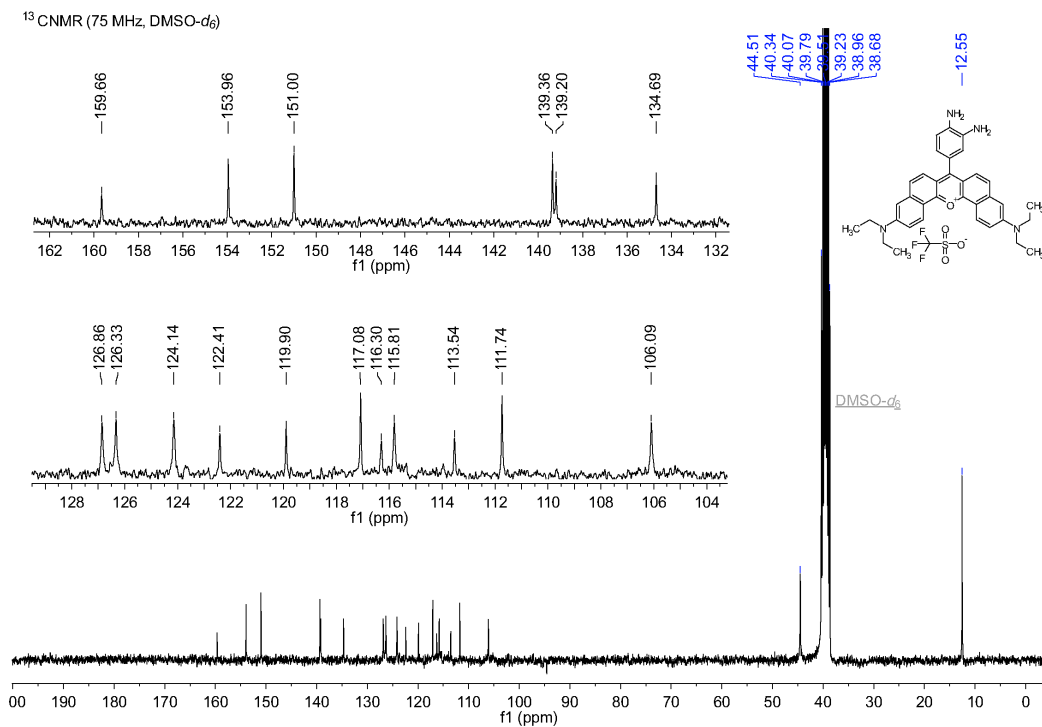Fig. S9 <sup>13</sup>C-NMR of probe 1b.

| Sample Name   | LW-61      | Position    | Vial 1 | Instrument Name | Instrument 1 | User Name              |                      |
|---------------|------------|-------------|--------|-----------------|--------------|------------------------|----------------------|
| Inj Vol       | 0          | InjPosition |        | SampleType      | Sample       | IRM Calibration Status | Success              |
| Data Filename | LW-61-02.d | ACQ Method  |        | Comment         |              | Acquired Time          | 7/2/2014 10:03:08 AM |

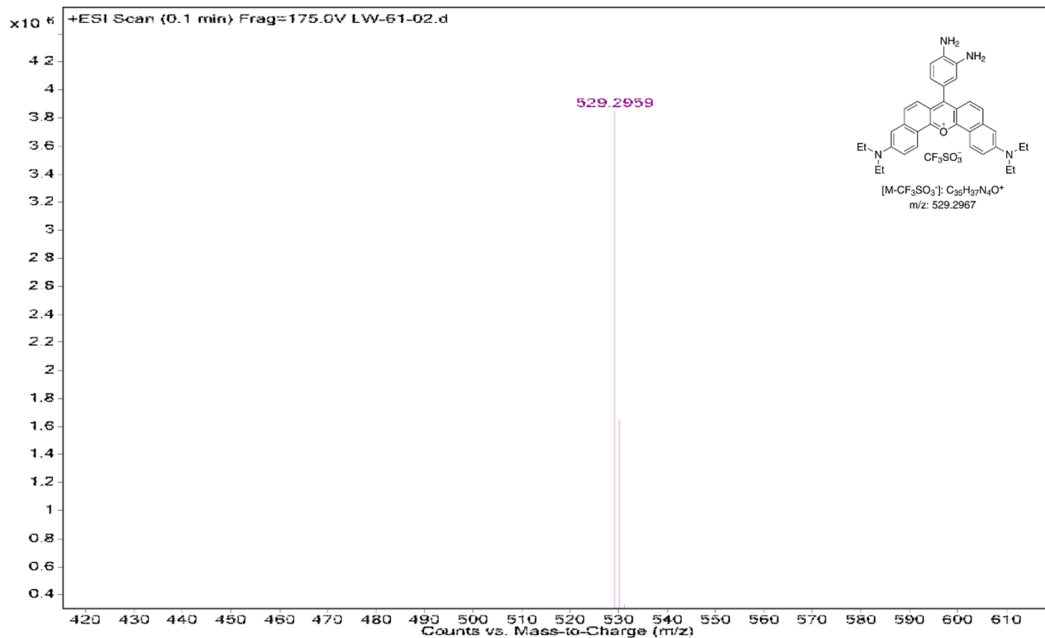Fig. S10 HRMS(ESI<sup>+</sup>) of probe 1b.



## Supporting Information

|               |            |             |        |                 |              |                        |                       |
|---------------|------------|-------------|--------|-----------------|--------------|------------------------|-----------------------|
| Sample Name   | LW-68      | Position    | Vial 1 | Instrument Name | Instrument 1 | User Name              |                       |
| Inj Vol       | 0          | InjPosition |        | SampleType      | Sample       | IRM Calibration Status | Success               |
| Data Filename | LW-68-01.d | ACQ Method  |        | Comment         |              | Acquired Time          | 10/10/2014 2:43:46 PM |

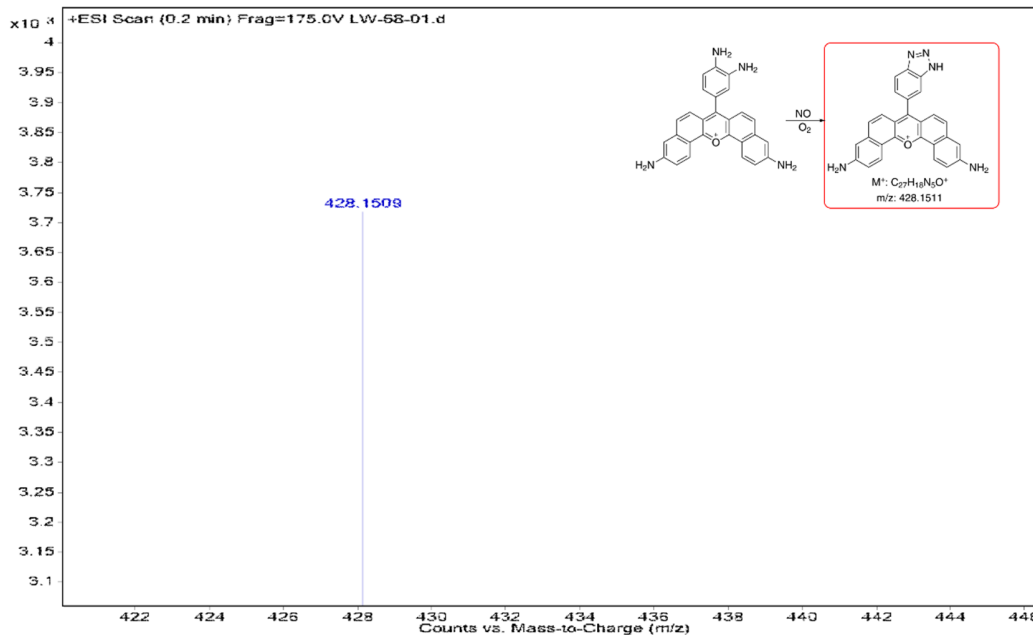**Fig. S11** HRMS(ESI<sup>+</sup>) of probe **1a** + NO donor.

|               |            |             |        |                 |              |                        |                      |
|---------------|------------|-------------|--------|-----------------|--------------|------------------------|----------------------|
| Sample Name   | LW-66      | Position    | Vial 1 | Instrument Name | Instrument 1 | User Name              |                      |
| Inj Vol       | 0          | InjPosition |        | SampleType      | Sample       | IRM Calibration Status | Success              |
| Data Filename | LW-66-01.d | ACQ Method  |        | Comment         |              | Acquired Time          | 7/2/2014 10:06:11 AM |

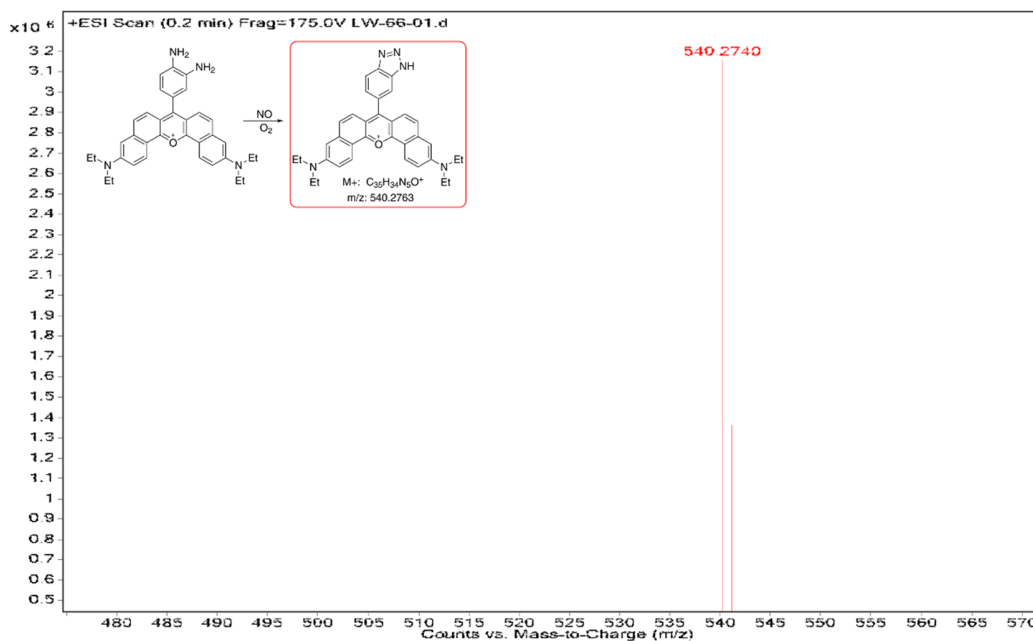**Fig. S12** HRMS(ESI<sup>+</sup>) of probe **1b** + NO donor.
